# Supplementary material
Source: MDPI journal article supplement (https://www.mdpi.com/2624-8611/5/2/35)
Supplement: s1 [file s1]

Archive with 1 entries (1 files):
- psych-2400672-supplementary.pdf
